# Supplementary material for: Immunomodulatory Effect of Helleborus purpurascens Waldst. & Kit
Source: MDPI journal article supplement (doi:10.3390/plants10101990), 2021-09-23
Supplement: s1 [file s1]

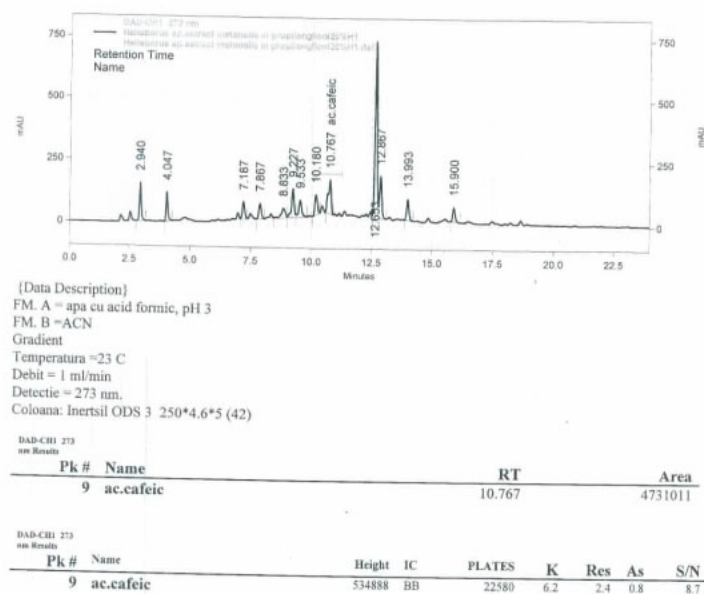

**Figure S1.** HPLC chromatogram of H1 - caffeic acid

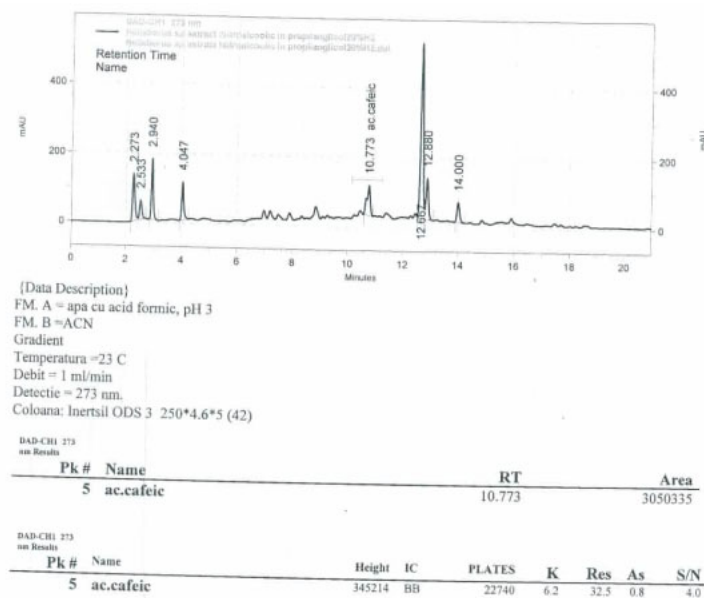

**Figure S2.** HPLC chromatogram of H2 - caffeic acid

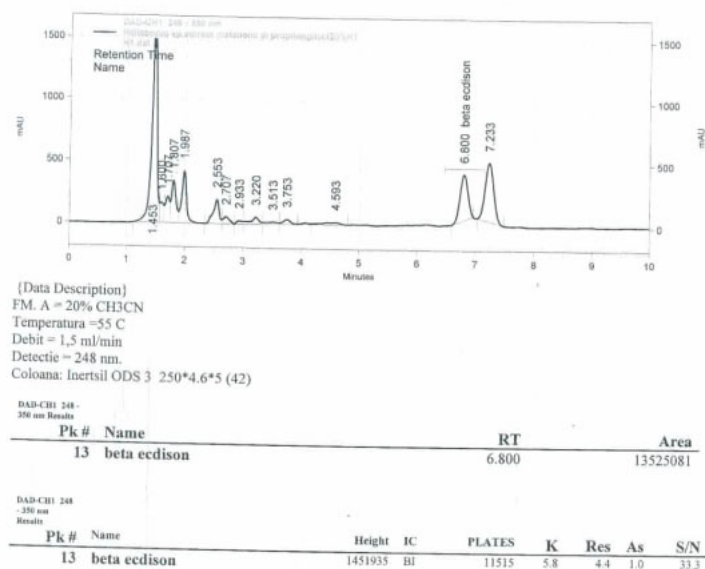

**Figure S3.** HPLC chromatogram of H1 -  $\beta$ -ecdysone

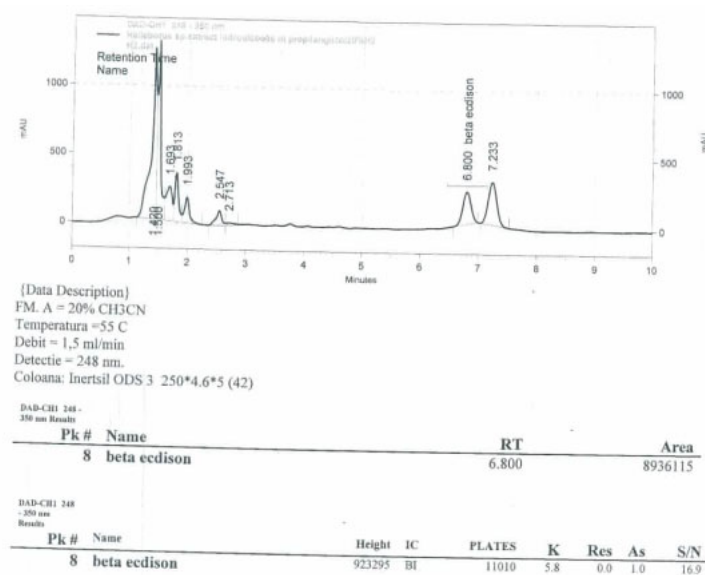

**Figure S4.** HPLC chromatogram of H2 -  $\beta$ -ecdysone
